# Supplementary material for: Chinese Herbal Medicines for the Treatment of Type A H1N1 Influenza: A Systematic Review of Randomized Controlled Trials
Source: PLoS One. 2011 Dec 2;6(12):e28093. doi: 10.1371/journal.pone.0028093 (PMC3229517; doi:10.1371/journal.pone.0028093)
Supplement: Table S3 — Excluded studies with reasons. (DOC) [file pone.0028093.s005.doc]

## Table S3. Excluded studies with reasons

| **Study** | **Reason for exclusion** |
| --- | --- |
| Chai 201033 | Retrospective study that did not match the included criteria of this review |
| Hu 201134 | Patients was complicated with pneumonia |
| Huang 201035 | Patients in the trials was suspected H1N1 influenza patients |
| Kou 201136 | Patients was complicated with pneumonia |
| Li 201037 | Randomized controlled trial but data were not available for analysis due to inadequate reporting |
| Li 201038 | Retrospective study that did not match the included criteria of this review |
| Liu 201039 | Randomized controlled trial that another Chinese herbs was taken as the control intervention |
| Liu 201040 | Randomized controlled trial but data were not available for analysis due to inadequate reporting |
| Qin 201041 | Randomized controlled trial that another Chinese herbs was taken as the control intervention |
| Qiu 201042 | Prophylactic randomized controlled trial that investigated Chinese herbs in the prevention of A/H1N1 influenza in pregnant women |
| Ru 201043 | Randomized controlled trial that another Chinese herbs was taken as the control intervention |
| Song 201044 | Randomized controlled trial that was a replicated publication of Chen 2010a8 |
| Wei 201045 | Randomized controlled trial but data were not available for analysis due to inadequate reporting |
| Wen 201046 | Randomized controlled trial that another Chinese herbs was taken as the control intervention |
| Xia 201047 | Randomized controlled trial that another Chinese herbs was taken as the control intervention |
| Xie 201048 | Randomized controlled trial that another Chinese herbs was taken as the control intervention |
| Xie 201049 | Quasi-randomized controlled trial that did not match the included criteria of this review |
| Yang 201050 | Randomized controlled trial that another Chinese herbs was taken as the control intervention |
| Zhang 201051 | Randomized controlled trial that another Chinese herbs was taken as the control intervention |
